# Supplementary material for: Simvastatin inhibits the adipogenesis of bone marrow-derived mesenchymal stem cells through the downregulation of chemerin/CMKLR1 signaling
Source: PubMed Central journal article supplement — Int J Mol Med. 2020 May 18;46(2):751–61. doi: 10.3892/ijmm.2020.4606 (PMC7307816; doi:10.3892/ijmm.2020.4606), 2020-05-18
Supplement: Supplementary_Data.pdf [file Supplementary_Data.pdf]

Figure S1. Expression of PPAR $\gamma$  by RT-qPCR in simvastatin- (SIM) or PBS-treated (CON) cells at day 3, 7 and 14 post differentiation (n=3) during adipogenic differentiation. Fold change was expressed as relative to the CON group, and the data are expressed as the means  $\pm$  SD. Data were analyzed by a Student's t-test; \*P<0.05. BMSCs, bone marrow-derived mesenchymal stem cells; PPAR $\gamma$ , peroxisome proliferator-activated receptor  $\gamma$ .

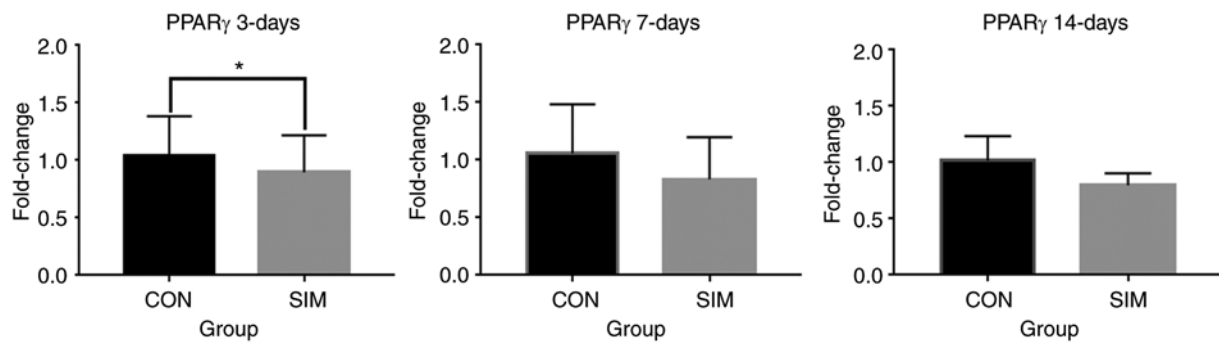

Figure S2. Role of GPR1 during adipogenesis in BMSCs. (A) Expression levels of GPR1 after simvastatin (SIM) or PBS (CON) treatment at days 3, 7 and 14 post-differentiation were analyzed by RT-qPCR (n=3). Data were analyzed by the Student's t-test; \*\*P<0.01. (B) BMSCs were transfected with or without adenovirus 48 h before differentiation. At days 3 and 14 post-differentiation, cells that exhibited adipogenic differentiation with PBS (CON) or simvastatin (SIM) treatment were analyzed by RT-qPCR for GPR1 expression (n=3). Data were examined by analysis of variance followed by the LSD post hoc test; \*P<0.05, \*\*P<0.01 and \*\*\*P<0.001. (C) At days 3 and 14 post-differentiation, cells that exhibited adipogenic differentiation with PBS (CON), rosiglitazone (ROSI), rosiglitazone and simvastatin (ROSI + SIM) or simvastatin (SIM) treatment were analyzed by RT-qPCR for GPR1 expression (n=3). Fold change was expressed relative to the CON group, and the data are expressed as the means  $\pm$  SD. Data were examined by analysis of variance followed by the LSD post hoc test; \*P<0.05 and \*\*P<0.01. BLANK, untransfected cells; NC, negative control; CKD, CMKLR1 knockdown; BMSCs, bone marrow-derived mesenchymal stem cells; GPR, G protein-coupled receptor.

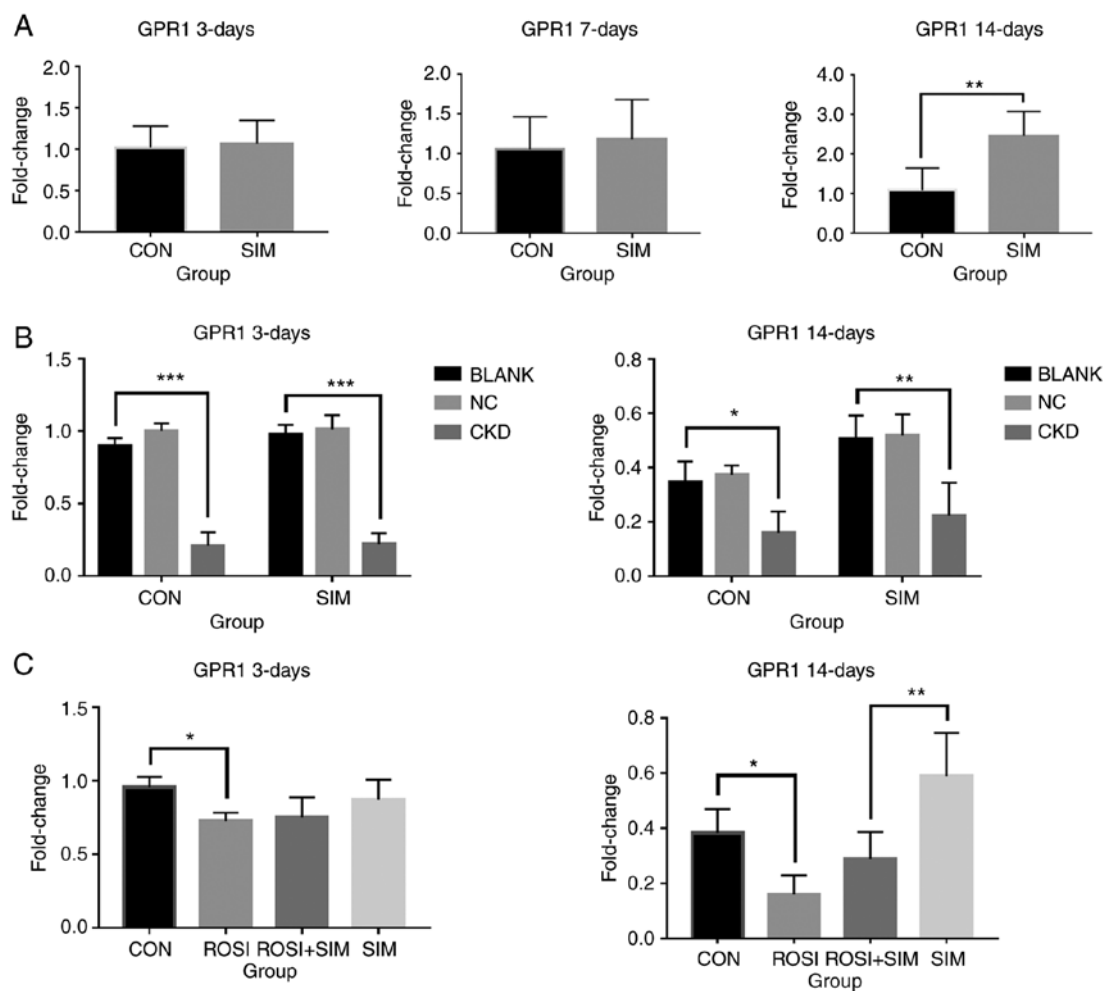

Figure S3. Immunofluorescence staining of each group of BMSCs after 48 h of transfection with adenovirus (magnification, x100). BLANK, untransfected cells; NC, negative control; CKD, CMKLR1 knockdown; BMSCs, bone marrow-derived mesenchymal stem cells.

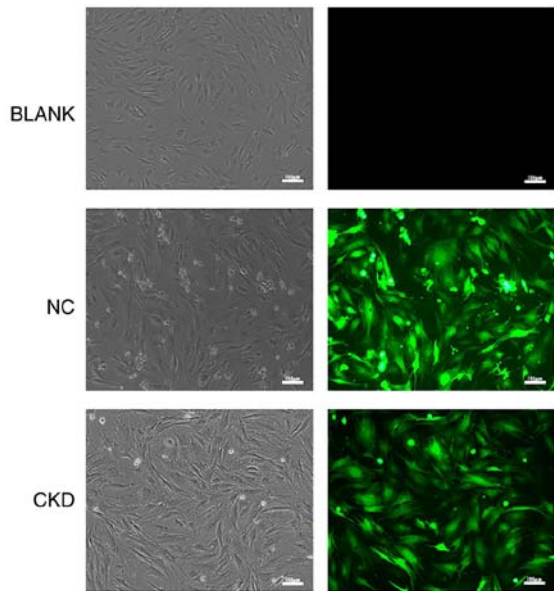

Figure S4. Western blot analysis of CMKLR1 and the loading control  $\beta$ -actin in each group of BMSCs after 48 h of transfection with adenovirus. (A) The density of the protein bands was quantified and calculated using Gelpro32 4.0 software. (B) Data were examined by analysis of variance followed by the LSD post hoc test; \*\*\* $P < 0.001$ . BLANK, untransfected cells; NC, negative control; CKD, CMKLR1 knockdown; BMSCs, bone marrow-derived mesenchymal stem cells; CMKLR1, chemokine-like receptor 1.

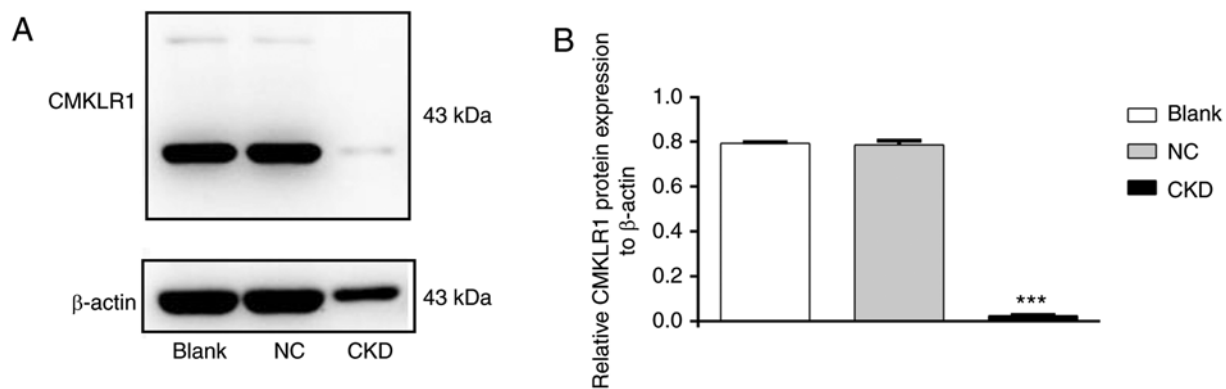

Table SI. Analysis by ANOVA followed by Dunnett's post hoc test of the data for CCK-8 assay presented in Fig. 1.

| Variable | (I) group        | (J) group | Average difference (I-J) | Standard error | Significance (P-value) | 95% Confidence interval |             |
|----------|------------------|-----------|--------------------------|----------------|------------------------|-------------------------|-------------|
|          |                  |           |                          |                |                        | Lower limit             | Upper limit |
| Day 1    | 10 <sup>-5</sup> | CON       | -.05800 <sup>a</sup>     | .01423         | .002                   | -.0957                  | -.0203      |
|          | 10 <sup>-6</sup> | CON       | -.01400                  | .01423         | .725                   | -.0517                  | .0237       |
|          | 10 <sup>-7</sup> | CON       | -.01000                  | .01423         | .889                   | -.0477                  | .0277       |
|          | 10 <sup>-8</sup> | CON       | -.00600                  | .01423         | .980                   | -.0437                  | .0317       |
| Day 2    | 10 <sup>-5</sup> | CON       | -.25600 <sup>a</sup>     | .01400         | <.001                  | -.2931                  | -.2189      |
|          | 10 <sup>-6</sup> | CON       | -.17000 <sup>a</sup>     | .01400         | <.001                  | -.2071                  | -.1329      |
|          | 10 <sup>-7</sup> | CON       | -.00200                  | .01400         | 1.000                  | -.0391                  | .0351       |
|          | 10 <sup>-8</sup> | CON       | .03400                   | .01400         | .078                   | -.0031                  | .0711       |
| Day 3    | 10 <sup>-5</sup> | CON       | -.74800 <sup>a</sup>     | .01552         | <.001                  | -.7891                  | -.7069      |
|          | 10 <sup>-6</sup> | CON       | -.51400 <sup>a</sup>     | .01552         | <.001                  | -.5551                  | -.4729      |
|          | 10 <sup>-7</sup> | CON       | -.02400                  | .01552         | .367                   | -.0651                  | .0171       |
|          | 10 <sup>-8</sup> | CON       | -.04800 <sup>a</sup>     | .01552         | .020                   | -.0891                  | -.0069      |
| Day 4    | 10 <sup>-5</sup> | CON       | -.88000 <sup>a</sup>     | .01217         | <.001                  | -.9123                  | -.8477      |
|          | 10 <sup>-6</sup> | CON       | -.56000 <sup>a</sup>     | .01217         | <.001                  | -.5923                  | -.5277      |
|          | 10 <sup>-7</sup> | CON       | -.07000 <sup>a</sup>     | .01217         | <.001                  | -.1023                  | -.0377      |
|          | 10 <sup>-8</sup> | CON       | .09400 <sup>a</sup>      | .01217         | <.001                  | .0617                   | .1263       |
| Day 5    | 10 <sup>-5</sup> | CON       | -1.01800 <sup>a</sup>    | .01531         | <.001                  | -1.0586                 | -.9774      |
|          | 10 <sup>-6</sup> | CON       | -.67400 <sup>a</sup>     | .01531         | <.001                  | -.7146                  | -.6334      |
|          | 10 <sup>-7</sup> | CON       | -.04600 <sup>a</sup>     | .01531         | .024                   | -.0866                  | -.0054      |
|          | 10 <sup>-8</sup> | CON       | .08200 <sup>a</sup>      | .01531         | <.001                  | .0414                   | .1226       |

ANOVA, analysis of variance; CCK-8, Cell Counting kit-8. <sup>a</sup>The average difference was significant at the 0.05 level.

Table SII. Analysis by ANOVA followed by the LSD post hoc test of the data for Oil Red O staining presented in Fig. 1.

| (I) Group | (J) Group | Average difference (I-J) | Standard error | Significance (P-value) | 95% Confidence interval |             |
|-----------|-----------|--------------------------|----------------|------------------------|-------------------------|-------------|
|           |           |                          |                |                        | Lower limit             | Upper limit |
| SIM       | A         | -.21000 <sup>a</sup>     | .09022         | .048                   | -.4180                  | -.0020      |
|           | B         | -.09667                  | .09022         | .315                   | -.3047                  | .1114       |
|           | CON       | -.43000 <sup>a</sup>     | .09022         | .001                   | -.6380                  | -.2220      |
| A         | SIM       | .21000 <sup>a</sup>      | .09022         | .048                   | .0020                   | .4180       |
|           | B         | .11333                   | .09022         | .244                   | -.0947                  | .3214       |
|           | CON       | -.22000 <sup>a</sup>     | .09022         | .041                   | -.4280                  | -.0120      |
| B         | SIM       | .09667                   | .09022         | .315                   | -.1114                  | .3047       |
|           | A         | -.11333                  | .09022         | .244                   | -.3214                  | .0947       |
|           | CON       | -.33333 <sup>a</sup>     | .09022         | .006                   | -.5414                  | -.1253      |
| CON       | SIM       | .43000 <sup>a</sup>      | .09022         | .001                   | .2220                   | .6380       |
|           | A         | .22000 <sup>a</sup>      | .09022         | .041                   | .0120                   | .4280       |
|           | B         | .33333 <sup>a</sup>      | .09022         | .006                   | .1253                   | .5414       |

ANOVA, analysis of variance; SIM, BMSCs treated with simvastatin for 14 days; A, for the first 3 days; B, after 3 days; CON, with PBS for 14 days. <sup>a</sup>The average difference was significant at the 0.05 level.

Table SIII. Analysis by Student's t-test of the data of the paired samples of the 3-day group presented in Figs. 2, S1 and S2A.

|              | Difference                            |         |                    |                        |                         |             |                                      |
|--------------|---------------------------------------|---------|--------------------|------------------------|-------------------------|-------------|--------------------------------------|
|              |                                       | Average | Standard deviation | Average standard error | 95% Confidence interval |             | Significance<br>(two-tailed P-value) |
|              |                                       |         |                    |                        | Lower limit             | Upper limit |                                      |
| Pair group 1 | PPAR $\gamma$ CON - PPAR $\gamma$ SIM | .14000  | .04583             | .02646                 | .02616                  | .25384      | .034                                 |
| Pair group 2 | Adiponectin CON - adiponectin SIM     | .06000  | .19287             | .11136                 | -.41912                 | .53912      | .644                                 |
| Pair group 3 | Chemerin CON - chemerin SIM           | .02000  | .29513             | .17039                 | -.71314                 | .75314      | .917                                 |
| Pair group 4 | CMKLR1 CON - CMKLR1 SIM               | .12333  | .12220             | .07055                 | -.18023                 | .42690      | .223                                 |
| Pair group 5 | GPR1 CON - GPR1 SIM                   | -.05000 | .13892             | .08021                 | -.39511                 | .29511      | .597                                 |

PPAR $\gamma$ , peroxisome proliferator-activated receptor  $\gamma$ ; CMKLR1, chemokine-like receptor 1; GPR1, G protein-coupled receptor 1; CON, control; SIM, simvastatin.

Table SIV. Analysis by Student's t-test of the data of the paired samples of the 7-day group presented in Figs. 2, S1 and S2A.

|              | Difference                            | 95% Confidence interval |                    |                        |             |             | Significance<br>(two-tailed P-value) |
|--------------|---------------------------------------|-------------------------|--------------------|------------------------|-------------|-------------|--------------------------------------|
|              |                                       | Average                 | Standard deviation | Average standard error | Lower limit | Upper limit |                                      |
|              |                                       |                         |                    |                        |             |             |                                      |
| Pair group 1 | PPAR $\gamma$ CON - PPAR $\gamma$ SIM | .22333                  | .08963             | .05175                 | .00068      | .44598      | .050                                 |
| Pair group 2 | Adiponectin CON - adiponectin SIM     | .18333                  | .12097             | .06984                 | -.11717     | .48384      | .120                                 |
| Pair group 3 | Chemerin CON - chemerin SIM           | .17333                  | .08083             | .04667                 | -.02746     | .37412      | .065                                 |
| Pair group 4 | CMKLR1 CON - CMKLR1 SIM               | -.44333                 | .10693             | .06173                 | -.70895     | -.17771     | .019                                 |
| Pair group 5 | GPR1 CON - GPR1 SIM                   | -.12667                 | .08737             | .05044                 | -.34370     | .09037      | .129                                 |

PPAR $\gamma$ , peroxisome proliferator-activated receptor  $\gamma$ ; CMKLR1, chemokine-like receptor 1; GPR1, G protein-coupled receptor 1; CON, control; SIM, simvastatin.



Table SV. Analysis by Student's t-test of the data of the paired samples of the 14-day group presented in Figs. 2, S1 and S2A.

|              | Difference |                    |                        |                         |             |                                      |  |
|--------------|------------|--------------------|------------------------|-------------------------|-------------|--------------------------------------|--|
|              | Average    | Standard deviation | Average standard error | 95% Confidence interval |             | Significance<br>(two-tailed P-value) |  |
|              |            |                    |                        | Lower limit             | Upper limit |                                      |  |
| Pair group 1 | .21667     | .13204             | .07623                 | -.11133                 | .54466      | .105                                 |  |
| Pair group 2 | .70667     | .28148             | .16251                 | .00742                  | 1.40591     | .049                                 |  |
| Pair group 3 | .20333     | .07572             | .04372                 | .01524                  | .39143      | .043                                 |  |
| Pair group 4 | -1.26000   | .19079             | .11015                 | -1.73394                | -.78606     | .008                                 |  |
| Pair group 5 | -1.37667   | .21733             | .12548                 | -1.91655                | -.83678     | .008                                 |  |

PPAR $\gamma$ , peroxisome proliferator-activated receptor  $\gamma$ ; CMKLR1, chemokine-like receptor 1; GPR1, G protein-coupled receptor 1; CON, control; SIM, simvastatin.

Table SVI. Analysis by ANOVA followed by the LSD post hoc test of data of the samples of the 3-day group presented in Figs. 3 and S2B.

| Variable  | (I) Group | (J) Group | Average difference (I-J) | Standard error      | Significance (P-value) |       |
|-----------|-----------|-----------|--------------------------|---------------------|------------------------|-------|
| CMKLR1    | BLANK     | NC        | -.02000                  | .04123              | .636                   |       |
|           |           | CKD       | .52000 <sup>a</sup>      | .04123              | <.001                  |       |
|           |           | SIM+BLANK | .01667                   | .04123              | .693                   |       |
|           |           | SIM+NC    | .00667                   | .04123              | .874                   |       |
|           |           | SIM+CKD   | .49000 <sup>a</sup>      | .04123              | <.001                  |       |
|           | NC        | BLANK     | .02000                   | .04123              | .636                   |       |
|           |           | CKD       | .54000 <sup>a</sup>      | .04123              | <.001                  |       |
|           |           | SIM+BLANK | .03667                   | .04123              | .391                   |       |
|           |           | SIM+NC    | .02667                   | .04123              | .530                   |       |
|           |           | SIM+CKD   | .51000 <sup>a</sup>      | .04123              | <.001                  |       |
|           | CKD       | BLANK     | -.52000 <sup>a</sup>     | .04123              | <.001                  |       |
|           |           | NC        | -.54000 <sup>a</sup>     | .04123              | <.001                  |       |
|           |           | SIM+BLANK | -.50333 <sup>a</sup>     | .04123              | <.001                  |       |
|           |           | SIM+NC    | -.51333 <sup>a</sup>     | .04123              | <.001                  |       |
|           |           | SIM+CKD   | -.03000                  | .04123              | .481                   |       |
|           | SIM+BLANK | BLANK     | -.01667                  | .04123              | .693                   |       |
|           |           | NC        | -.03667                  | .04123              | .391                   |       |
|           |           | CKD       | .50333 <sup>a</sup>      | .04123              | <.001                  |       |
|           |           | SIM+NC    | -.01000                  | .04123              | .812                   |       |
|           |           | SIM+CKD   | .47333 <sup>a</sup>      | .04123              | <.001                  |       |
|           | SIM+NC    | BLANK     | -.00667                  | .04123              | .874                   |       |
|           |           | NC        | -.02667                  | .04123              | .530                   |       |
|           |           | CKD       | .51333 <sup>a</sup>      | .04123              | <.001                  |       |
|           |           | SIM+BLANK | .01000                   | .04123              | .812                   |       |
|           |           | SIM+CKD   | .48333 <sup>a</sup>      | .04123              | <.001                  |       |
|           | SIM+CKD   | BLANK     | -.49000 <sup>a</sup>     | .04123              | <.001                  |       |
|           |           | NC        | -.51000 <sup>a</sup>     | .04123              | <.001                  |       |
|           |           | CKD       | .03000                   | .04123              | .481                   |       |
|           |           | SIM+BLANK | -.47333 <sup>a</sup>     | .04123              | <.001                  |       |
|           |           | SIM+NC    | -.48333 <sup>a</sup>     | .04123              | <.001                  |       |
|           | GPR1      | BLANK     | NC                       | -.10333             | .06046                 | .113  |
|           |           |           | CKD                      | .68667 <sup>a</sup> | .06046                 | <.001 |
|           |           |           | SIM+BLANK                | -.07667             | .06046                 | .229  |
|           |           |           | SIM+NC                   | -.11667             | .06046                 | .078  |
|           |           |           | SIM+CKD                  | .67667 <sup>a</sup> | .06046                 | <.001 |
|           |           | NC        | BLANK                    | .10333              | .06046                 | .113  |
| CKD       |           |           | .79000 <sup>a</sup>      | .06046              | <.001                  |       |
| SIM+BLANK |           |           | .02667                   | .06046              | .667                   |       |
| SIM+NC    |           |           | -.01333                  | .06046              | .829                   |       |
| SIM+CKD   |           |           | .78000 <sup>a</sup>      | .06046              | <.001                  |       |
| CKD       |           | BLANK     | -.68667 <sup>a</sup>     | .06046              | <.001                  |       |
|           |           | NC        | -.79000 <sup>a</sup>     | .06046              | <.001                  |       |
|           |           | SIM+BLANK | -.76333 <sup>a</sup>     | .06046              | <.001                  |       |
|           |           | SIM+NC    | -.80333 <sup>a</sup>     | .06046              | <.001                  |       |
|           |           | SIM+CKD   | -.01000                  | .06046              | .871                   |       |
| SIM+BLANK |           | BLANK     | .07667                   | .06046              | .229                   |       |
|           |           | NC        | -.02667                  | .06046              | .667                   |       |
|           |           | CKD       | .76333 <sup>a</sup>      | .06046              | <.001                  |       |
|           |           | SIM+NC    | -.04000                  | .06046              | .521                   |       |
|           |           | SIM+CKD   | .75333 <sup>a</sup>      | .06046              | <.001                  |       |
| SIM+NC    |           | BLANK     | .11667                   | .06046              | .078                   |       |
|           |           | NC        | .01333                   | .06046              | .829                   |       |
|           |           | CKD       | .80333 <sup>a</sup>      | .06046              | <.001                  |       |
|           |           | SIM+BLANK | .04000                   | .06046              | .521                   |       |
|           |           | SIM+CKD   | .79333 <sup>a</sup>      | .06046              | <.001                  |       |

Table SVI. Continued.

| Variable    | (I) Group | (J) Group | Average difference (I-J) | Standard error        | Significance (P-value) |       |
|-------------|-----------|-----------|--------------------------|-----------------------|------------------------|-------|
| Adiponectin | SIM+CKD   | BLANK     | -.67667 <sup>a</sup>     | .06046                | <.001                  |       |
|             |           | NC        | -.78000 <sup>a</sup>     | .06046                | <.001                  |       |
|             |           | CKD       | .01000                   | .06046                | .871                   |       |
|             |           | SIM+BLANK | -.75333 <sup>a</sup>     | .06046                | <.001                  |       |
|             |           | SIM+NC    | -.79333 <sup>a</sup>     | .06046                | <.001                  |       |
|             | BLANK     | NC        | NC                       | -.22333               | .33318                 | .515  |
|             |           |           | CKD                      | 2.64333 <sup>a</sup>  | .33318                 | <.001 |
|             |           |           | SIM+BLANK                | .14000                | .33318                 | .682  |
|             |           |           | SIM+NC                   | .07000                | .33318                 | .837  |
|             |           |           | SIM+CKD                  | 2.67333 <sup>a</sup>  | .33318                 | <.001 |
|             |           | CKD       | BLANK                    | .22333                | .33318                 | .515  |
|             |           |           | CKD                      | 2.86667 <sup>a</sup>  | .33318                 | <.001 |
|             |           |           | SIM+BLANK                | .36333                | .33318                 | .297  |
|             |           |           | SIM+NC                   | .29333                | .33318                 | .396  |
|             |           |           | SIM+CKD                  | 2.89667 <sup>a</sup>  | .33318                 | <.001 |
|             | CKD       | BLANK     | BLANK                    | -2.64333 <sup>a</sup> | .33318                 | <.001 |
|             |           |           | NC                       | -2.86667 <sup>a</sup> | .33318                 | <.001 |
|             |           |           | SIM+BLANK                | -2.50333 <sup>a</sup> | .33318                 | <.001 |
|             |           |           | SIM+NC                   | -2.57333 <sup>a</sup> | .33318                 | <.001 |
|             |           |           | SIM+CKD                  | .03000                | .33318                 | .930  |
|             |           | SIM+BLANK | BLANK                    | -.14000               | .33318                 | .682  |
|             |           |           | NC                       | -.36333               | .33318                 | .297  |
|             |           |           | CKD                      | 2.50333 <sup>a</sup>  | .33318                 | <.001 |
|             |           |           | SIM+NC                   | -.07000               | .33318                 | .837  |
|             |           |           | SIM+CKD                  | 2.53333 <sup>a</sup>  | .33318                 | <.001 |
|             | SIM+NC    | BLANK     | BLANK                    | -.07000               | .33318                 | .837  |
|             |           |           | NC                       | -.29333               | .33318                 | .396  |
|             |           |           | CKD                      | 2.57333 <sup>a</sup>  | .33318                 | <.001 |
|             |           |           | SIM+BLANK                | .07000                | .33318                 | .837  |
|             |           |           | SIM+CKD                  | 2.60333 <sup>a</sup>  | .33318                 | <.001 |
| SIM+CKD     |           | BLANK     | -2.67333 <sup>a</sup>    | .33318                | <.001                  |       |
|             |           | NC        | -2.89667 <sup>a</sup>    | .33318                | <.001                  |       |
|             |           | CKD       | -.03000                  | .33318                | .930                   |       |
|             |           | SIM+BLANK | -2.53333 <sup>a</sup>    | .33318                | <.001                  |       |
|             |           | SIM+NC    | -2.60333 <sup>a</sup>    | .33318                | <.001                  |       |

CMKLR1, chemokine-like receptor 1; GPR1, G protein-coupled receptor 1; BLANK, untransfected cells; NC, negative control; CKD, CMKLR1 knockdown; SIM, simvastatin. <sup>a</sup>The average difference was significant at the 0.05 level.

Table SVII. Analysis by ANOVA followed by the LSD post hoc test of data of the samples of the 14-day group presented in Figs. 3 and S2B.

| Variable | (I) Group | (J) Group | Average difference (I-J) | Standard error | Significance (P-value) |
|----------|-----------|-----------|--------------------------|----------------|------------------------|
| CMKLR1   | BLANK     | NC        | .01000                   | .03844         | .799                   |
|          |           | CKD       | .18000 <sup>a</sup>      | .03844         | .001                   |
|          |           | SIM+BLANK | -.13333 <sup>a</sup>     | .03844         | .005                   |
|          |           | SIM+NC    | -.10000 <sup>a</sup>     | .03844         | .023                   |
|          |           | SIM+CKD   | .17000 <sup>a</sup>      | .03844         | .001                   |
|          | NC        | BLANK     | -.01000                  | .03844         | .799                   |
|          |           | CKD       | .17000 <sup>a</sup>      | .03844         | .001                   |
|          |           | SIM+BLANK | -.14333 <sup>a</sup>     | .03844         | .003                   |
|          |           | SIM+NC    | -.11000 <sup>a</sup>     | .03844         | .014                   |
|          |           | SIM+CKD   | .16000 <sup>a</sup>      | .03844         | .001                   |
|          | CKD       | BLANK     | -.18000 <sup>a</sup>     | .03844         | .001                   |
|          |           | NC        | -.17000 <sup>a</sup>     | .03844         | .001                   |
|          |           | SIM+BLANK | -.31333 <sup>a</sup>     | .03844         | <.001                  |
|          |           | SIM+NC    | -.28000 <sup>a</sup>     | .03844         | <.001                  |
|          |           | SIM+CKD   | -.01000                  | .03844         | .799                   |
|          | SIM+BLANK | BLANK     | .13333 <sup>a</sup>      | .03844         | .005                   |
|          |           | NC        | .14333 <sup>a</sup>      | .03844         | .003                   |
|          |           | CKD       | .31333 <sup>a</sup>      | .03844         | <.001                  |
|          |           | SIM+NC    | .03333                   | .03844         | .403                   |
|          |           | SIM+CKD   | .30333 <sup>a</sup>      | .03844         | <.001                  |
|          | SIM+NC    | BLANK     | .10000 <sup>a</sup>      | .03844         | .023                   |
|          |           | NC        | .11000 <sup>a</sup>      | .03844         | .014                   |
|          |           | CKD       | .28000 <sup>a</sup>      | .03844         | <.001                  |
|          |           | SIM+BLANK | -.03333                  | .03844         | .403                   |
|          |           | SIM+CKD   | .27000 <sup>a</sup>      | .03844         | <.001                  |
|          | SIM+CKD   | BLANK     | -.17000 <sup>a</sup>     | .03844         | .001                   |
|          |           | NC        | -.16000 <sup>a</sup>     | .03844         | .001                   |
|          |           | CKD       | .01000                   | .03844         | .799                   |
|          |           | SIM+BLANK | -.30333 <sup>a</sup>     | .03844         | <.001                  |
|          |           | SIM+NC    | -.27000 <sup>a</sup>     | .03844         | <.001                  |
| GPR1     | BLANK     | NC        | -.02667                  | .06719         | .698                   |
|          |           | CKD       | .18667 <sup>a</sup>      | .06719         | .017                   |
|          |           | SIM+BLANK | -.16000 <sup>a</sup>     | .06719         | .035                   |
|          |           | SIM+NC    | -.17333 <sup>a</sup>     | .06719         | .024                   |
|          |           | SIM+CKD   | .12333                   | .06719         | .091                   |
|          | NC        | BLANK     | .02667                   | .06719         | .698                   |
|          |           | CKD       | .21333 <sup>a</sup>      | .06719         | .008                   |
|          |           | SIM+BLANK | -.13333                  | .06719         | .071                   |
|          |           | SIM+NC    | -.14667 <sup>a</sup>     | .06719         | .050                   |
|          |           | SIM+CKD   | .15000 <sup>a</sup>      | .06719         | .045                   |
|          | CKD       | BLANK     | -.18667 <sup>a</sup>     | .06719         | .017                   |
|          |           | NC        | -.21333 <sup>a</sup>     | .06719         | .008                   |
|          |           | SIM+BLANK | -.34667 <sup>a</sup>     | .06719         | <.001                  |
|          |           | SIM+NC    | -.36000 <sup>a</sup>     | .06719         | <.001                  |
|          |           | SIM+CKD   | -.06333                  | .06719         | .364                   |
|          | SIM+BLANK | BLANK     | .16000 <sup>a</sup>      | .06719         | .035                   |
|          |           | NC        | .13333                   | .06719         | .071                   |
|          |           | CKD       | .34667 <sup>a</sup>      | .06719         | <.001                  |
|          |           | SIM+NC    | -.01333                  | .06719         | .846                   |
|          |           | SIM+CKD   | .28333 <sup>a</sup>      | .06719         | .001                   |
|          | SIM+NC    | BLANK     | .17333 <sup>a</sup>      | .06719         | .024                   |
|          |           | NC        | .14667 <sup>a</sup>      | .06719         | .050                   |
|          |           | CKD       | .36000 <sup>a</sup>      | .06719         | <.001                  |
|          |           | SIM+BLANK | .01333                   | .06719         | .846                   |
|          |           | SIM+CKD   | .29667 <sup>a</sup>      | .06719         | .001                   |

Table SVII. Continued.

| Variable    | (I) Group | (J) Group | Average difference (I-J) | Standard error         | Significance (P-value) |       |
|-------------|-----------|-----------|--------------------------|------------------------|------------------------|-------|
| Adiponectin | SIM+CKD   | BLANK     | -.12333                  | .06719                 | .091                   |       |
|             |           | NC        | -.15000 <sup>a</sup>     | .06719                 | .045                   |       |
|             |           | CKD       | .06333                   | .06719                 | .364                   |       |
|             |           | SIM+BLANK | -.28333 <sup>a</sup>     | .06719                 | .001                   |       |
|             |           | SIM+NC    | -.29667 <sup>a</sup>     | .06719                 | .001                   |       |
|             | BLANK     | NC        | NC                       | -4.94333               | 7.93636                | .545  |
|             |           |           | CKD                      | 86.80333 <sup>a</sup>  | 7.93636                | <.001 |
|             |           |           | SIM+BLANK                | 59.55333 <sup>a</sup>  | 7.93636                | <.001 |
|             |           |           | SIM+NC                   | 54.72667 <sup>a</sup>  | 7.93636                | <.001 |
|             |           |           | SIM+CKD                  | 89.49667 <sup>a</sup>  | 7.93636                | <.001 |
|             |           | CKD       | BLANK                    | 4.94333                | 7.93636                | .545  |
|             |           |           | CKD                      | 91.74667 <sup>a</sup>  | 7.93636                | <.001 |
|             |           |           | SIM+BLANK                | 64.49667 <sup>a</sup>  | 7.93636                | <.001 |
|             |           |           | SIM+NC                   | 59.67000 <sup>a</sup>  | 7.93636                | <.001 |
|             |           |           | SIM+CKD                  | 94.44000 <sup>a</sup>  | 7.93636                | <.001 |
|             | CKD       | BLANK     | BLANK                    | -86.80333 <sup>a</sup> | 7.93636                | <.001 |
|             |           |           | NC                       | -91.74667 <sup>a</sup> | 7.93636                | <.001 |
|             |           |           | SIM+BLANK                | -27.25000 <sup>a</sup> | 7.93636                | .005  |
|             |           |           | SIM+NC                   | -32.07667 <sup>a</sup> | 7.93636                | .002  |
|             |           |           | SIM+CKD                  | 2.69333                | 7.93636                | .740  |
|             | SIM+BLANK | BLANK     | BLANK                    | -59.55333 <sup>a</sup> | 7.93636                | <.001 |
|             |           |           | NC                       | -64.49667 <sup>a</sup> | 7.93636                | <.001 |
|             |           |           | CKD                      | 27.25000 <sup>a</sup>  | 7.93636                | .005  |
|             |           |           | SIM+NC                   | -4.82667               | 7.93636                | .554  |
|             |           |           | SIM+CKD                  | 29.94333 <sup>a</sup>  | 7.93636                | .003  |
|             | SIM+NC    | BLANK     | BLANK                    | -54.72667 <sup>a</sup> | 7.93636                | <.001 |
|             |           |           | NC                       | -59.67000 <sup>a</sup> | 7.93636                | <.001 |
|             |           |           | CKD                      | 32.07667 <sup>a</sup>  | 7.93636                | .002  |
|             |           |           | SIM+BLANK                | 4.82667                | 7.93636                | .554  |
|             |           |           | SIM+CKD                  | 34.77000 <sup>a</sup>  | 7.93636                | .001  |
| SIM+CKD     | BLANK     | BLANK     | -89.49667 <sup>a</sup>   | 7.93636                | <.001                  |       |
|             |           | NC        | -94.44000 <sup>a</sup>   | 7.93636                | <.001                  |       |
|             |           | CKD       | -2.69333                 | 7.93636                | .740                   |       |
|             |           | SIM+BLANK | -29.94333 <sup>a</sup>   | 7.93636                | .003                   |       |
|             |           | SIM+NC    | -34.77000 <sup>a</sup>   | 7.93636                | .001                   |       |

CMKLR1, chemokine-like receptor 1; GPR1, G protein-coupled receptor 1; BLANK, untransfected cells; NC, negative control; CKD, CMKLR1 knockdown; SIM, simvastatin. <sup>a</sup>The average difference was significant at the 0.05 level.

Table SVIII. Analysis by ANOVA followed by the LSD post hoc test of data of the samples of Oil Red O staining presented in Fig. 3.

| (I) Group   | (J) Group   | Average difference<br>(I-J) | Standard error | Significance<br>(P-value) | 95% Confidence interval |             |
|-------------|-------------|-----------------------------|----------------|---------------------------|-------------------------|-------------|
|             |             |                             |                |                           | Lower limit             | Upper limit |
| CON (BLANK) | CON (NC)    | .07667                      | .05121         | .160                      | -.0349                  | .1882       |
|             | CON (CKD)   | .63000 <sup>a</sup>         | .05121         | <.001                     | .5184                   | .7416       |
|             | SIM (BLANK) | .35667 <sup>a</sup>         | .05121         | <.001                     | .2451                   | .4682       |
|             | SIM (NC)    | .42000 <sup>a</sup>         | .05121         | <.001                     | .3084                   | .5316       |
|             | SIM (CKD)   | .63667 <sup>a</sup>         | .05121         | <.001                     | .5251                   | .7482       |
| CON (NC)    | CON (BLANK) | -.07667                     | .05121         | .160                      | -.1882                  | .0349       |
|             | CON (CKD)   | .55333 <sup>a</sup>         | .05121         | <.001                     | .4418                   | .6649       |
|             | SIM (BLANK) | .28000 <sup>a</sup>         | .05121         | <.001                     | .1684                   | .3916       |
|             | SIM (NC)    | .34333 <sup>a</sup>         | .05121         | <.001                     | .2318                   | .4549       |
|             | SIM (CKD)   | .56000 <sup>a</sup>         | .05121         | <.001                     | .4484                   | .6716       |
| CON (CKD)   | CON (BLANK) | -.63000 <sup>a</sup>        | .05121         | <.001                     | -.7416                  | -.5184      |
|             | CON (NC)    | -.55333 <sup>a</sup>        | .05121         | <.001                     | -.6649                  | -.4418      |
|             | SIM (BLANK) | -.27333 <sup>a</sup>        | .05121         | <.001                     | -.3849                  | -.1618      |
|             | SIM (NC)    | -.21000 <sup>a</sup>        | .05121         | .001                      | -.3216                  | -.0984      |
|             | SIM (CKD)   | .00667                      | .05121         | .899                      | -.1049                  | .1182       |
| SIM (BLANK) | CON (BLANK) | -.35667 <sup>a</sup>        | .05121         | <.001                     | -.4682                  | -.2451      |
|             | CON (NC)    | -.28000 <sup>a</sup>        | .05121         | <.001                     | -.3916                  | -.1684      |
|             | CON (CKD)   | .27333 <sup>a</sup>         | .05121         | <.001                     | .1618                   | .3849       |
|             | SIM (NC)    | .06333                      | .05121         | .240                      | -.0482                  | .1749       |
|             | SIM (CKD)   | .28000 <sup>a</sup>         | .05121         | <.001                     | .1684                   | .3916       |
| SIM (NC)    | CON (BLANK) | -.42000 <sup>a</sup>        | .05121         | <.001                     | -.5316                  | -.3084      |
|             | CON (NC)    | -.34333 <sup>a</sup>        | .05121         | <.001                     | -.4549                  | -.2318      |
|             | CON (CKD)   | .21000 <sup>a</sup>         | .05121         | .001                      | .0984                   | .3216       |
|             | SIM (BLANK) | -.06333                     | .05121         | .240                      | -.1749                  | .0482       |
|             | SIM (CKD)   | .21667 <sup>a</sup>         | .05121         | .001                      | .1051                   | .3282       |
| SIM (CKD)   | CON (BLANK) | -.63667 <sup>a</sup>        | .05121         | <.001                     | -.7482                  | -.5251      |
|             | CON (NC)    | -.56000 <sup>a</sup>        | .05121         | <.001                     | -.6716                  | -.4484      |
|             | CON (CKD)   | -.00667                     | .05121         | .899                      | -.1182                  | .1049       |
|             | SIM (BLANK) | -.28000 <sup>a</sup>        | .05121         | <.001                     | -.3916                  | -.1684      |
|             | SIM (NC)    | -.21667 <sup>a</sup>        | .05121         | .001                      | -.3282                  | -.1051      |

ANOVA, analysis of variance; CON, control; SIM, simvastatin; BLANK, untransfected cells; NC, negative control; CKD, CMKLR1 knock-down. <sup>a</sup>The average difference was significant at the 0.05 level.

Table SIX. Analysis by ANOVA followed by the LSD post hoc test of the data of the samples of the 3-day group presented in Figs. 4 and S2C.

| Variable      | (I) Group | (J) Group | Average difference (I-J) | Standard error | Significance (P-value) |
|---------------|-----------|-----------|--------------------------|----------------|------------------------|
| PPAR $\gamma$ | CON       | ROSI      | -56.80667 <sup>a</sup>   | 4.42400        | <.001                  |
|               |           | ROSI+SIM  | -42.52000 <sup>a</sup>   | 4.42400        | <.001                  |
|               |           | SIM       | 1.50667                  | 4.42400        | .742                   |
|               | ROSI      | CON       | 56.80667 <sup>a</sup>    | 4.42400        | <.001                  |
|               |           | ROSI+SIM  | 14.28667 <sup>a</sup>    | 4.42400        | .012                   |
|               |           | SIM       | 58.31333 <sup>a</sup>    | 4.42400        | <.001                  |
|               | ROSI+SIM  | CON       | 42.52000 <sup>a</sup>    | 4.42400        | <.001                  |
|               |           | ROSI      | -14.28667 <sup>a</sup>   | 4.42400        | .012                   |
|               |           | SIM       | 44.02667 <sup>a</sup>    | 4.42400        | <.001                  |
|               | SIM       | CON       | -1.50667                 | 4.42400        | .742                   |
|               |           | ROSI      | -58.31333 <sup>a</sup>   | 4.42400        | <.001                  |
|               |           | ROSI+SIM  | -44.02667 <sup>a</sup>   | 4.42400        | <.001                  |
| Adiponectin   | CON       | ROSI      | -.28000                  | .58045         | .642                   |
|               |           | ROSI+SIM  | .10333                   | .58045         | .863                   |
|               |           | SIM       | .21000                   | .58045         | .727                   |
|               | ROSI      | CON       | .28000                   | .58045         | .642                   |
|               |           | ROSI+SIM  | .38333                   | .58045         | .528                   |
|               |           | SIM       | .49000                   | .58045         | .423                   |
|               | ROSI+SIM  | CON       | -.10333                  | .58045         | .863                   |
|               |           | ROSI      | -.38333                  | .58045         | .528                   |
|               |           | SIM       | .10667                   | .58045         | .859                   |
|               | SIM       | CON       | -.21000                  | .58045         | .727                   |
|               |           | ROSI      | -.49000                  | .58045         | .423                   |
|               |           | ROSI+SIM  | -.10667                  | .58045         | .859                   |
| Chemerin      | CON       | ROSI      | -11.67333 <sup>a</sup>   | 1.02764        | <.001                  |
|               |           | ROSI+SIM  | -8.72000 <sup>a</sup>    | 1.02764        | <.001                  |
|               |           | SIM       | -.30333                  | 1.02764        | .775                   |
|               | ROSI      | CON       | 11.67333 <sup>a</sup>    | 1.02764        | <.001                  |
|               |           | ROSI+SIM  | 2.95333 <sup>a</sup>     | 1.02764        | .021                   |
|               |           | SIM       | 11.37000 <sup>a</sup>    | 1.02764        | <.001                  |
|               | ROSI+SIM  | CON       | 8.72000 <sup>a</sup>     | 1.02764        | <.001                  |
|               |           | ROSI      | -2.95333 <sup>a</sup>    | 1.02764        | .021                   |
|               |           | SIM       | 8.41667 <sup>a</sup>     | 1.02764        | <.001                  |
|               | SIM       | CON       | .30333                   | 1.02764        | .775                   |
|               |           | ROSI      | -11.37000 <sup>a</sup>   | 1.02764        | <.001                  |
|               |           | ROSI+SIM  | -8.41667 <sup>a</sup>    | 1.02764        | <.001                  |
| CMKLR1        | CON       | ROSI      | .26333 <sup>a</sup>      | .06888         | .005                   |
|               |           | ROSI+SIM  | .19000 <sup>a</sup>      | .06888         | .025                   |
|               |           | SIM       | -.01667                  | .06888         | .815                   |
|               | ROSI      | CON       | -.26333 <sup>a</sup>     | .06888         | .005                   |
|               |           | ROSI+SIM  | -.07333                  | .06888         | .318                   |
|               |           | SIM       | -.28000 <sup>a</sup>     | .06888         | .004                   |
|               | ROSI+SIM  | CON       | -.19000 <sup>a</sup>     | .06888         | .025                   |
|               |           | ROSI      | .07333                   | .06888         | .318                   |
|               |           | SIM       | -.20667 <sup>a</sup>     | .06888         | .017                   |
|               | SIM       | CON       | .01667                   | .06888         | .815                   |
|               |           | ROSI      | .28000 <sup>a</sup>      | .06888         | .004                   |
|               |           | ROSI+SIM  | .20667 <sup>a</sup>      | .06888         | .017                   |
| GPR1          | CON       | ROSI      | .23000 <sup>a</sup>      | .08528         | .027                   |
|               |           | ROSI+SIM  | .20333 <sup>a</sup>      | .08528         | .044                   |
|               |           | SIM       | .08333                   | .08528         | .357                   |
|               | ROSI      | CON       | -.23000 <sup>a</sup>     | .08528         | .027                   |
|               |           | ROSI+SIM  | -.02667                  | .08528         | .763                   |
|               |           | SIM       | -.14667                  | .08528         | .124                   |
|               | ROSI+SIM  | CON       | -.20333 <sup>a</sup>     | .08528         | .044                   |
|               |           | ROSI      | .02667                   | .08528         | .763                   |
|               |           | SIM       | -.12000                  | .08528         | .197                   |

Table SIX. Continued.

| Variable | (I) Group | (J) Group | Average difference (I-J) | Standard error | Significance (P-value) |
|----------|-----------|-----------|--------------------------|----------------|------------------------|
|          | SIM       | CON       | -.08333                  | .08528         | .357                   |
|          |           | ROSI      | .14667                   | .08528         | .124                   |
|          |           | ROSI+SIM  | .12000                   | .08528         | .197                   |

ANOVA, analysis of variance; PPAR $\gamma$ , peroxisome proliferator-activated receptor  $\gamma$ ; CMKLR1, chemokine-like receptor 1; GPR1, G protein-coupled receptor 1; CON, control; ROSI, rosiglitazone; SIM, simvastatin. <sup>a</sup>The average difference was significant at the 0.05 level.



Table SX. Analysis by ANOVA followed by the LSD post hoc test of the data of the samples of the 14-day group presented in Figs. 4 and S2C.

| Variable      | (I) Group | (J) Group | Average difference (I-J) | Standard error | Significance (P-value) |
|---------------|-----------|-----------|--------------------------|----------------|------------------------|
| PPAR $\gamma$ | CON       | ROSI      | -56.37667 <sup>a</sup>   | 8.73120        | <.001                  |
|               |           | ROSI+SIM  | -25.32333 <sup>a</sup>   | 8.73120        | .020                   |
|               |           | SIM       | 21.28667 <sup>a</sup>    | 8.73120        | .041                   |
|               | ROSI      | CON       | 56.37667 <sup>a</sup>    | 8.73120        | <.001                  |
|               |           | ROSI+SIM  | 31.05333 <sup>a</sup>    | 8.73120        | .007                   |
|               |           | SIM       | 77.66333 <sup>a</sup>    | 8.73120        | <.001                  |
|               | ROSI+SIM  | CON       | 25.32333 <sup>a</sup>    | 8.73120        | .020                   |
|               |           | ROSI      | -31.05333 <sup>a</sup>   | 8.73120        | .007                   |
|               |           | SIM       | 46.61000 <sup>a</sup>    | 8.73120        | .001                   |
|               | SIM       | CON       | -21.28667 <sup>a</sup>   | 8.73120        | .041                   |
|               |           | ROSI      | -77.66333 <sup>a</sup>   | 8.73120        | <.001                  |
|               |           | ROSI+SIM  | -46.61000 <sup>a</sup>   | 8.73120        | .001                   |
| Adiponectin   | CON       | ROSI      | -35.33333 <sup>a</sup>   | 9.35407        | .005                   |
|               |           | ROSI+SIM  | 29.66333 <sup>a</sup>    | 9.35407        | .013                   |
|               |           | SIM       | 53.15000 <sup>a</sup>    | 9.35407        | <.001                  |
|               | ROSI      | CON       | 35.33333 <sup>a</sup>    | 9.35407        | .005                   |
|               |           | ROSI+SIM  | 64.99667 <sup>a</sup>    | 9.35407        | <.001                  |
|               |           | SIM       | 88.48333 <sup>a</sup>    | 9.35407        | <.001                  |
|               | ROSI+SIM  | CON       | -29.66333 <sup>a</sup>   | 9.35407        | .013                   |
|               |           | ROSI      | -64.99667 <sup>a</sup>   | 9.35407        | <.001                  |
|               |           | SIM       | 23.48667 <sup>a</sup>    | 9.35407        | .036                   |
|               | SIM       | CON       | -53.15000 <sup>a</sup>   | 9.35407        | <.001                  |
|               |           | ROSI      | -88.48333 <sup>a</sup>   | 9.35407        | <.001                  |
|               |           | ROSI+SIM  | -23.48667 <sup>a</sup>   | 9.35407        | .036                   |
| Chemerin      | CON       | ROSI      | -37.71000 <sup>a</sup>   | 12.27690       | .015                   |
|               |           | ROSI+SIM  | 2.52667                  | 12.27690       | .842                   |
|               |           | SIM       | 32.39667 <sup>a</sup>    | 12.27690       | .030                   |
|               | ROSI      | CON       | 37.71000 <sup>a</sup>    | 12.27690       | .015                   |
|               |           | ROSI+SIM  | 40.23667 <sup>a</sup>    | 12.27690       | .011                   |
|               |           | SIM       | 70.10667 <sup>a</sup>    | 12.27690       | <.001                  |
|               | ROSI+SIM  | CON       | -2.52667                 | 12.27690       | .842                   |
|               |           | ROSI      | -40.23667 <sup>a</sup>   | 12.27690       | .011                   |
|               |           | SIM       | 29.87000 <sup>a</sup>    | 12.27690       | .041                   |
|               | SIM       | CON       | -32.39667 <sup>a</sup>   | 12.27690       | .030                   |
|               |           | ROSI      | -70.10667 <sup>a</sup>   | 12.27690       | <.001                  |
|               |           | ROSI+SIM  | -29.87000 <sup>a</sup>   | 12.27690       | .041                   |
| CMKLR1        | CON       | ROSI      | .16000 <sup>a</sup>      | .05935         | .027                   |
|               |           | ROSI+SIM  | -.01000                  | .05935         | .870                   |
|               |           | SIM       | -.28000 <sup>a</sup>     | .05935         | .002                   |
|               | ROSI      | CON       | -.16000 <sup>a</sup>     | .05935         | .027                   |
|               |           | ROSI+SIM  | -.17000 <sup>a</sup>     | .05935         | .021                   |
|               |           | SIM       | -.44000 <sup>a</sup>     | .05935         | <.001                  |
|               | ROSI+SIM  | CON       | .01000                   | .05935         | .870                   |
|               |           | ROSI      | .17000 <sup>a</sup>      | .05935         | .021                   |
|               |           | SIM       | -.27000 <sup>a</sup>     | .05935         | .002                   |
|               | SIM       | CON       | .28000 <sup>a</sup>      | .05935         | .002                   |
|               |           | ROSI      | .44000 <sup>a</sup>      | .05935         | <.001                  |
|               |           | ROSI+SIM  | .27000 <sup>a</sup>      | .05935         | .002                   |
| GPR1          | CON       | ROSI      | .22333 <sup>a</sup>      | .08759         | .034                   |
|               |           | ROSI+SIM  | .09333                   | .08759         | .318                   |
|               |           | SIM       | -.20667 <sup>a</sup>     | .08759         | .046                   |
|               | ROSI      | CON       | -.22333 <sup>a</sup>     | .08759         | .034                   |
|               |           | ROSI+SIM  | -.13000                  | .08759         | .176                   |
|               |           | SIM       | -.43000 <sup>a</sup>     | .08759         | .001                   |
|               | ROSI+SIM  | CON       | -.09333                  | .08759         | .318                   |
|               |           | ROSI      | .13000                   | .08759         | .176                   |
|               |           | SIM       | -.30000 <sup>a</sup>     | .08759         | .009                   |

Table SX. Continued.

| Variable | (I) Group | (J) Group | Average difference (I-J) | Standard error | Significance (P-value) |
|----------|-----------|-----------|--------------------------|----------------|------------------------|
|          | SIM       | CON       | .20667 <sup>a</sup>      | .08759         | .046                   |
|          |           | ROSI      | .43000 <sup>a</sup>      | .08759         | .001                   |
|          |           | ROSI+SIM  | .30000 <sup>a</sup>      | .08759         | .009                   |

ANOVA, analysis of variance; PPAR $\gamma$ , peroxisome proliferator-activated receptor  $\gamma$ ; CMKLR1, chemokine-like receptor 1; GPR1, G protein-coupled receptor 1; CON, control; ROSI, rosiglitazone; SIM, simvastatin. <sup>a</sup>The average difference was significant at the 0.05 level.
